# Supplementary material
Source: MDPI journal article supplement (https://www.mdpi.com/search?q=magnetochemistry-09-00201)
Supplement: s001 [file magnetochemistry-09-00201-s001.zip]

# Supplementary Information for: “NiFe Alloy Nanoparticles Tuning the Structure, Magnetism, and Application for Oxygen Evolution Reaction Catalysis”

Rafael A. Raimundo <sup>1,2</sup>, Vinícius D. Silva <sup>3</sup>, Luciena S. Ferreira <sup>3</sup>, Francisco J. A. Loureiro <sup>4</sup>, Duncan P. Fagg <sup>4</sup>, Daniel A. Macedo <sup>3</sup>, Uílame U. Gomes <sup>5</sup>, Márcio M. Soares <sup>2</sup>, Rodinei M. Gomes <sup>1</sup> and Marco A. Morales <sup>6,\*</sup>

<sup>1</sup> Department of Mechanical Engineering, Universidade Federal da Paraíba, João Pessoa 58051-900, Brazil; rar@academico.ufpb.br (R.A.R.); rodineix@gmail.com (R.M.G.)

<sup>2</sup> Department of Physics, Universidade Federal da Paraíba, João Pessoa 58051-900, Brazil; marciosoaresm@gmail.com

<sup>3</sup> Department of Materials Science and Engineering, Universidade Federal da Paraíba, João Pessoa 58051-900, Brazil; viniciusdiasbrasil@hotmail.com (V.D.S.); luciena.ferreira@yahoo.com.br (L.S.F.); damaced@gmail.com (D.A.M.)

<sup>4</sup> Centre for Mechanical Technology and Automation, Department of Mechanical Engineering, University of Aveiro, 3810-193 Aveiro, Portugal; francisco.loureiro@ua.pt (F.J.A.L.); duncan@ua.pt (D.P.F.)

<sup>5</sup> Department of Materials Science and Engineering, Universidade Federal do Rio Grande do Norte, Natal 59078-970, Brazil; umbelino@fisica.ufrn.br

<sup>6</sup> Department of Physics, Universidade Federal do Rio Grande do Norte, Natal 59078-970, Brazil

\* Correspondence: morales@fisica.ufrn.br

## A. XPS spectra

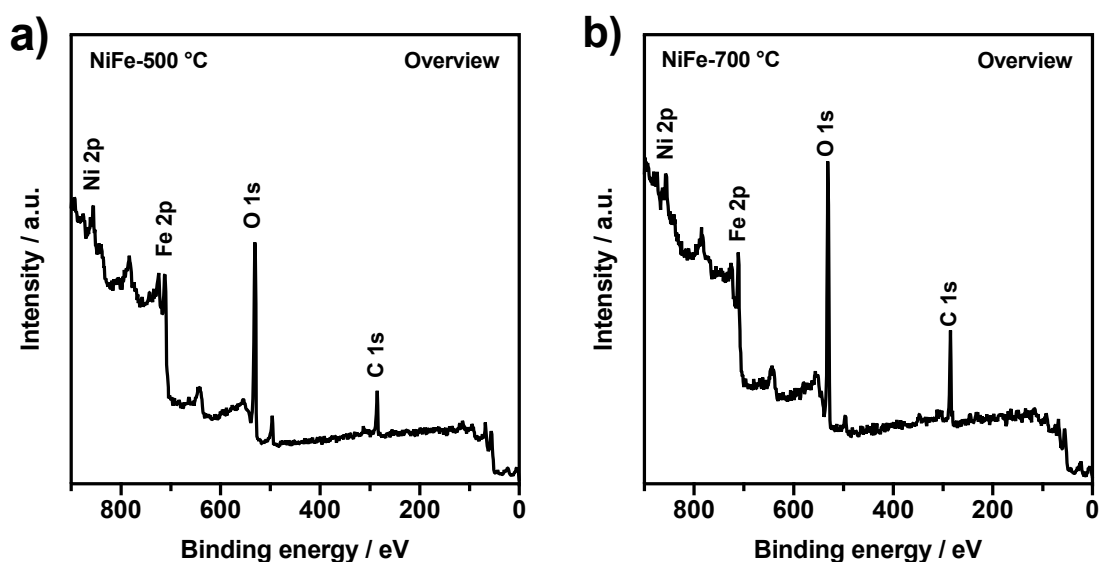

**Figure S1.** Overview XPS spectra of (a) NiFe-500 and (b) NiFe-700 samples.

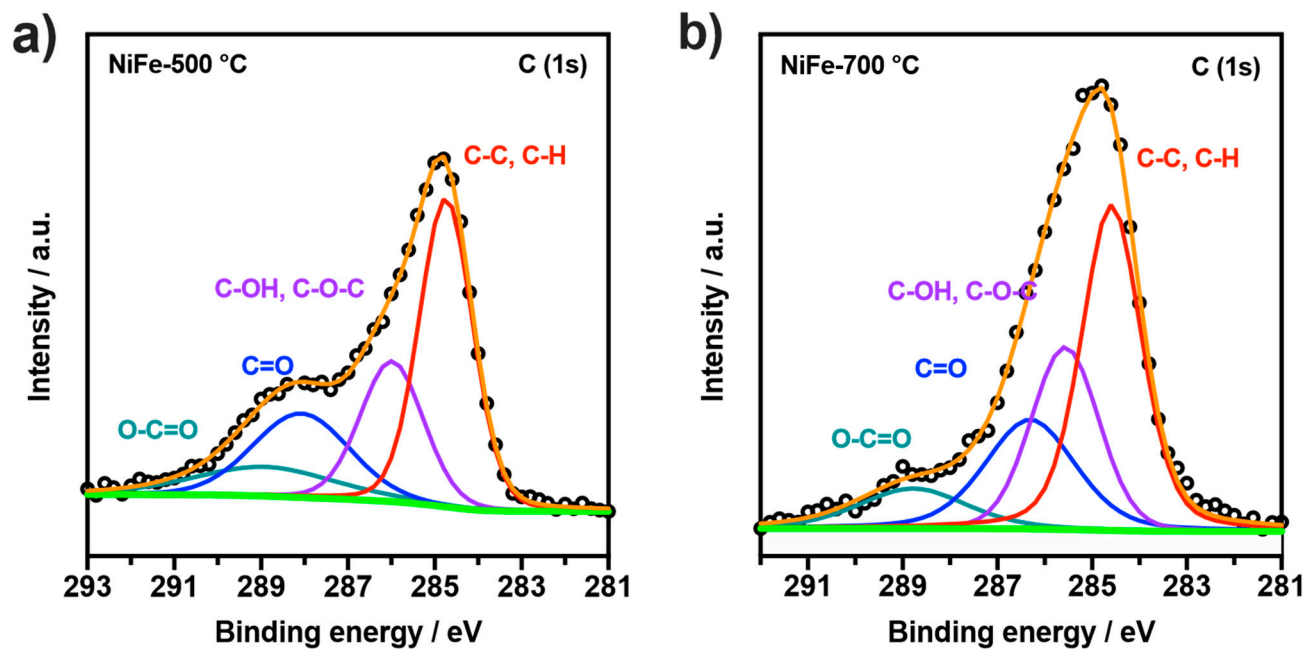

**Figure S2.** High-resolution XPS spectra of the C 1s bands in (a) NiFe-500 and (b) NiFe-700 samples.
